# Supplementary material for: POM species, temperature and counterions modulated the various dimensionalities of POM-based metal–organic frameworks
Source: Royal Society of Chemistry journal article supplement (doi:10.1039/c5dt04094a), 2015-12-09
Supplement: c5dt04094a1.pdf [file c5dt04094a1.pdf]

**POM Species, Temperature and Counterions Modulated the Various  
Dimensionalities of POM-based Metal-Organic Frameworks**

Jing-Wen Sun,<sup>†</sup> Peng-Fei Yan,<sup>\*,†</sup> Guang-Hui An,<sup>†</sup> Jing-Quan Sha,<sup>‡</sup> Cheng Wang,<sup>†</sup> and Guang-  
Ming Li<sup>\*,†</sup>

<sup>†</sup>*Key Laboratory of Functional Inorganic Material Chemistry (MOE), P. R. China; School of  
Chemistry and Materials Science, Heilongjiang University; Harbin, 150080, P. R. China*

<sup>‡</sup>*School of Pharmacy, Jiamusi University, Jiamusi, 154007, P. R. China*

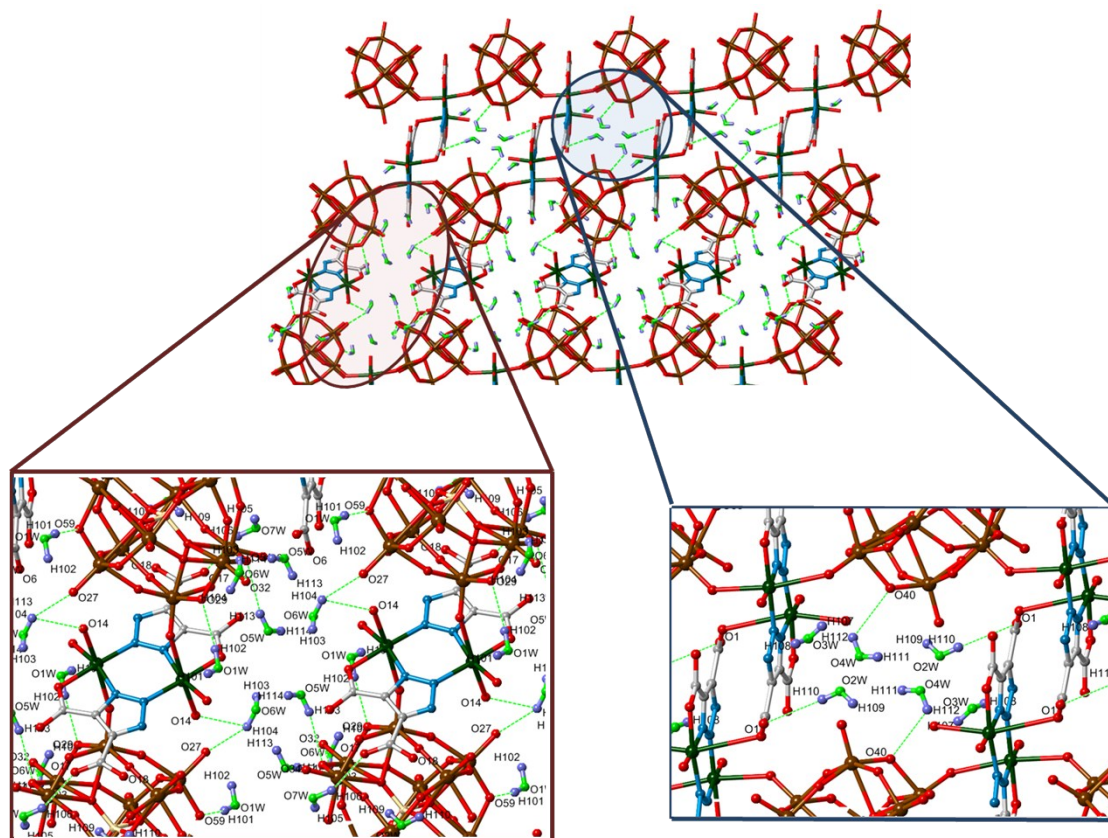

**Figure S1.** The interactions between water molecules, 2D POM-SBU layers in **2**.

**Table S1.** Bond lengths [ $\text{\AA}$ ] and angles [deg] for **2**

| D-H $\cdots$ A              | d(D-H) ( $\text{\AA}$ ) | d(H $\cdots$ A) ( $\text{\AA}$ ) | D-H $\cdots$ A (deg) |
|-----------------------------|-------------------------|----------------------------------|----------------------|
| O(1W)-H(102) $\cdots$ O(29) | 0.849                   | 2.208                            | 171.719              |
| O(1W)-H(101) $\cdots$ O(59) | 0.855                   | 2.222                            | 169.680              |
| O(2W)-H(110) $\cdots$ O(1)  | 0.828                   | 2.748                            | 166.706              |
| O(4W)-H(112) $\cdots$ O(40) | 0.849                   | 2.588                            | 122.031              |
| O(5W)-H(113) $\cdots$ O(29) | 0.828                   | 2.337                            | 167.130              |
| O(6W)-H(103) $\cdots$ O(32) | 0.834                   | 2.767                            | 120.194              |
| O(6W)-H(104) $\cdots$ O(27) | 0.860                   | 2.574                            | 147.782              |
| O(7W)-H(106) $\cdots$ O(17) | 0.867                   | 2.105                            | 151.285              |

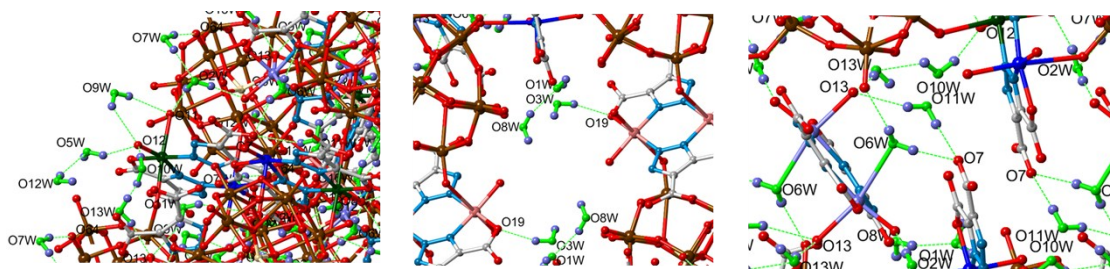

**Figure S2.** The H-bond interactions in **3**.

**Table S2.** Bond lengths [ $\text{\AA}$ ] and angles [deg] for **3**

| D–H $\cdots$ A                | d(D–H) ( $\text{\AA}$ ) | d(H $\cdots$ A) ( $\text{\AA}$ ) | D–H $\cdots$ A (deg) |
|-------------------------------|-------------------------|----------------------------------|----------------------|
| O(1W)–H(118) $\cdots$ O(20)   | 0.850                   | 2.460                            | 128.386              |
| O(2W)–H(119) $\cdots$ O(14)   | 0.851                   | 1.854                            | 173.307              |
| O(2W)–H(120) $\cdots$ O(11)   | 0.851                   | 2.031                            | 165.269              |
| O(3W)–H(501) $\cdots$ O(19)   | 0.858                   | 2.167                            | 162.709              |
| O(5W)–H(125) $\cdots$ O(12)   | 0.851                   | 1.998                            | 151.276              |
| O(6W)–H(123) $\cdots$ O(7)    | 0.849                   | 1.982                            | 154.941              |
| O(6W)–H(124) $\cdots$ O(62)   | 0.851                   | 2.485                            | 166.406              |
| O(7W)–H(122) $\cdots$ O(2W)   | 0.850                   | 2.014                            | 165.545              |
| O(7W)–H(121) $\cdots$ O(64)   | 0.851                   | 2.112                            | 168.731              |
| O(8W)–H(116) $\cdots$ O(1W)   | 0.850                   | 1.933                            | 156.621              |
| O(9W)–H(113) $\cdots$ O(11)   | 0.851                   | 2.451                            | 166.116              |
| O(9W)–H(114) $\cdots$ O(12)   | 0.849                   | 2.395                            | 129.194              |
| O(10W)–H(112) $\cdots$ O(13W) | 0.851                   | 2.032                            | 119.858              |
| O(10W)–H(111) $\cdots$ O(10)  | 0.850                   | 1.804                            | 152.481              |
| O(11W)–H(109) $\cdots$ O(13)  | 0.851                   | 2.313                            | 149.344              |
| O(11W)–H(110) $\cdots$ O(7)   | 0.848                   | 2.447                            | 148.196              |
| O(12W)–H(101) $\cdots$ O(5W)  | 0.850                   | 2.100                            | 138.888              |
| O(13W)–H(103) $\cdots$ O(13)  | 0.851                   | 2.002                            | 158.198              |

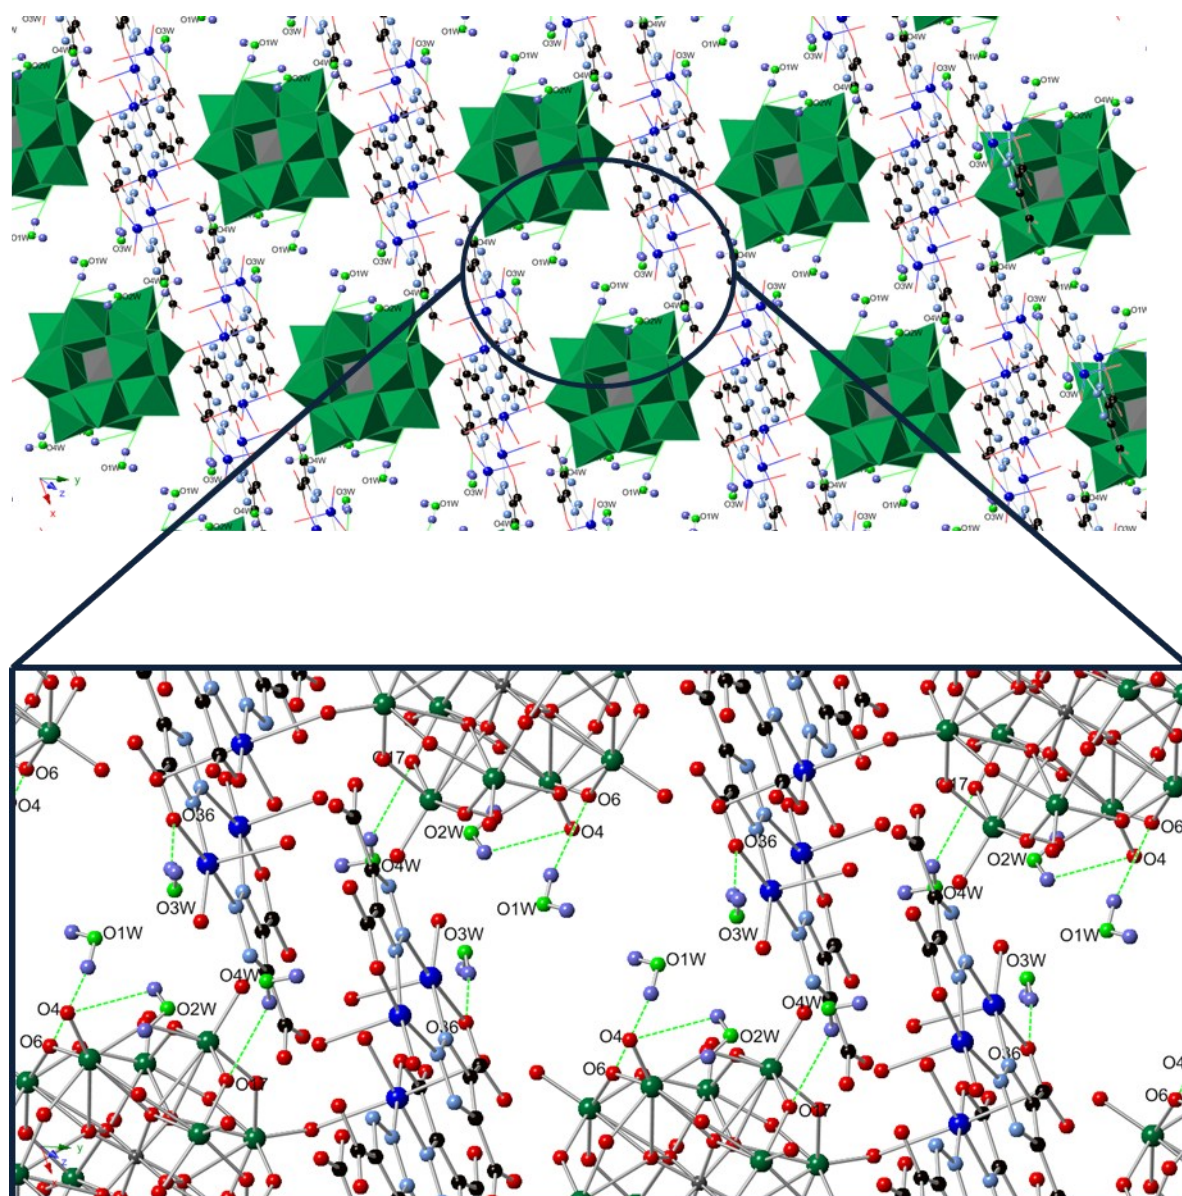

Figure S3. The H-bond interactions in 4.

Table S3. Bond lengths [ $\text{\AA}$ ] and angles [deg] for 4

| D-H $\cdots$ A              | d(D-H) ( $\text{\AA}$ ) | d(H $\cdots$ A) ( $\text{\AA}$ ) | D-H $\cdots$ A (deg) |
|-----------------------------|-------------------------|----------------------------------|----------------------|
| O(1W)-H(101) $\cdots$ O(6)  | 0.849                   | 2.405                            | 167.174              |
| O(2W)-H(103) $\cdots$ O(4)  | 0.855                   | 2.772                            | 125.358              |
| O(3W)-H(105) $\cdots$ O(36) | 0.847                   | 2.345                            | 168.685              |
| O(4W)-H(107) $\cdots$ O(17) | 0.853                   | 2.772                            | 149.274              |







**Table S6.** Selected bond lengths [Å] and angles [deg] for **1**

|                   |           |                   |           |
|-------------------|-----------|-------------------|-----------|
| N(4)-Cu(2)        | 1.91(3)   | N(1)-Cu(4)        | 2.02(3)   |
| N(6)-Cu(1)        | 2.00(3)   | O(21)-Cu(3)       | 2.42(2)   |
| N(7)-Cu(1)        | 1.95(3)   | O(32)-Cu(3)       | 1.90(3)   |
| N(10)-Cu(3)       | 1.97(2)   | O(35)-Cu(1)       | 2.02(3)   |
| N(11)-Cu(3)       | 2.01(3)   | O(36)-Cu(1)       | 2.25(3)   |
| N(8)-Cu(4)        | 1.94(3)   | O(42)-Cu(2)       | 1.95(2)   |
| N(2)-Cu(2)        | 1.95(3)   | O(43)-Cu(1)       | 2.40(2)   |
| O(55)-Cu(1)       | 2.09(3)   | O(50)-Cu(2)       | 1.97(2)   |
| O(57)-Cu(4)       | 2.00(3)   | O(51)-Cu(4)       | 2.41(3)   |
| O(63)-Cu(4)       | 1.95(3)   | O(63)-Cu(4)-O(57) | 92.5(15)  |
| O(32)-Cu(3)-N(11) | 171.6(11) | N(10)-Cu(3)-N(11) | 95.2(9)   |
| N(7)-Cu(1)-N(6)   | 97.1(11)  | O(17)-Cu(3)-N(11) | 83.1(11)  |
| N(7)-Cu(1)-O(35)  | 175.0(12) | O(32)-Cu(3)-O(21) | 91.2(10)  |
| N(6)-Cu(1)-O(35)  | 79.0(12)  | N(10)-Cu(3)-O(21) | 87.9(9)   |
| N(7)-Cu(1)-O(55)  | 94.1(13)  | O(17)-Cu(3)-O(21) | 93.9(9)   |
| N(6)-Cu(1)-O(55)  | 166.5(14) | N(11)-Cu(3)-O(21) | 94.3(8)   |
| O(35)-Cu(1)-O(55) | 89.4(14)  | N(8)-Cu(4)-O(63)  | 176.4(13) |
| N(7)-Cu(1)-O(36)  | 92.9(13)  | N(8)-Cu(4)-O(57)  | 86.6(13)  |
| N(6)-Cu(1)-O(36)  | 96.4(13)  | N(10)-Cu(3)-O(17) | 177.6(11) |
| O(35)-Cu(1)-O(36) | 90.6(13)  | N(8)-Cu(4)-N(1)   | 97.1(12)  |
| O(55)-Cu(1)-O(36) | 90.5(14)  | O(63)-Cu(4)-N(1)  | 83.5(14)  |
| N(7)-Cu(1)-O(43)  | 86.2(10)  | O(57)-Cu(4)-N(1)  | 173.8(15) |
| N(6)-Cu(1)-O(43)  | 88.7(10)  | N(8)-Cu(4)-O(51)  | 91.9(11)  |
| O(35)-Cu(1)-O(43) | 90.6(9)   | O(63)-Cu(4)-O(51) | 91.7(12)  |
| O(55)-Cu(1)-O(43) | 84.6(12)  | O(57)-Cu(4)-O(51) | 93.5(13)  |
| O(36)-Cu(1)-O(43) | 174.9(11) | N(1)-Cu(4)-O(51)  | 91.3(12)  |
| N(4)-Cu(2)-N(2)   | 95.6(10)  | N(4)-Cu(2)-O(50)  | 171.9(10) |
| N(4)-Cu(2)-O(42)  | 89.9(10)  | N(2)-Cu(2)-O(50)  | 81.9(10)  |
| N(2)-Cu(2)-O(42)  | 174.4(12) | O(42)-Cu(2)-O(50) | 92.5(10)  |
| O(32)-Cu(3)-O(17) | 90.2(13)  | O(32)-Cu(3)-N(10) | 91.3(13)  |

**Table S7.** Selected bond lengths [Å] and angles [deg] for **2**

|                      |           |                     |            |
|----------------------|-----------|---------------------|------------|
| N(1)-Cu(2)           | 1.969(5)  | O(10)-Cu(3)         | 2.373(5)   |
| N(2)-Cu(3)           | 1.936(5)  | O(11)-Cu(3)         | 1.951(5)   |
| N(8)-Cu(1)           | 1.966(6)  | O(13)-Cu(1)         | 1.947(5)   |
| O(4)-Cu(3)           | 1.968(5)  | O(14)-Cu(1)         | 2.314(5)   |
| O(8)-Cu(2)           | 1.978(4)  | O(15)-Cu(1)#1       | 1.962(6)   |
| O(9)-Cu(2)           | 1.932(5)  | O(15)#1-Cu(1)-O(14) | 87.6(2)    |
| O(13)-Cu(1)-O(15)#1  | 88.1(3)   | N(8)-Cu(1)-O(14)    | 94.9(2)    |
| O(13)-Cu(1)-N(8)     | 92.6(3)   | N(7)#1-Cu(1)-O(14)  | 94.3(2)    |
| O(15)#1-Cu(1)-N(8)   | 177.3(2)  | O(9)-Cu(2)-N(5)     | 91.5(2)    |
| O(13)-Cu(1)-N(7)#1   | 165.8(2)  | O(9)-Cu(2)-N(1)     | 171.2(2)   |
| O(15)#1-Cu(1)-N(7)#1 | 81.7(3)   | N(5)-Cu(2)-N(1)     | 97.2(2)    |
| N(8)-Cu(1)-N(7)#1    | 97.2(2)   | O(9)-Cu(2)-O(8)     | 89.6(2)    |
| O(13)-Cu(1)-O(14)    | 95.2(3)   | N(5)-Cu(2)-O(8)     | 178.9(2)   |
| N(1)-Cu(2)-O(8)      | 81.6(2)   | O(11)-Cu(3)-O(4)    | 88.5(2)    |
| N(2)-Cu(3)-O(11)     | 92.4(2)   | N(6)-Cu(3)-O(4)     | 81.8(2)    |
| N(2)-Cu(3)-N(6)      | 96.9(2)   | N(2)-Cu(3)-O(10)    | 100.76(19) |
| O(11)-Cu(3)-N(6)     | 169.8(2)  | O(11)-Cu(3)-O(10)   | 95.7(2)    |
| N(2)-Cu(3)-O(4)      | 173.1(2)  | N(6)-Cu(3)-O(10)    | 86.7(2)    |
| O(4)-Cu(3)-O(10)     | 86.00(19) |                     |            |

Symmetry transformations used to generate equivalent atoms: #1 -x+1, -y+2, -z+2.

**Table S8.** Selected bond lengths [Å] and angles [deg] for **3**

|                  |          |                     |          |
|------------------|----------|---------------------|----------|
| Cu(1)-N(2)       | 1.933(6) | Cu(2)-O(11)         | 2.348(6) |
| Cu(1)-O(9)       | 1.957(6) | Cu(4)-N(11)         | 1.959(7) |
| Cu(1)-O(5)       | 1.972(6) | Cu(4)-N(10)#2       | 1.976(7) |
| Cu(1)-N(4)       | 1.975(7) | Cu(4)-O(24)         | 1.977(6) |
| Cu(1)-O(10)      | 2.254(7) | Cu(4)-O(19)         | 1.989(5) |
| Cu(2)-O(12)      | 1.955(6) | Cu(4)-O(21)         | 2.247(7) |
| Cu(2)-N(3)#1     | 1.969(7) | O(1)-Cu(2)#3        | 2.007(6) |
| Cu(2)-N(5)#1     | 1.990(7) | N(3)-Cu(2)#3        | 1.969(7) |
| Cu(2)-O(1)#1     | 2.007(6) | N(5)-Cu(2)#3        | 1.990(7) |
| N(7)-Cu(3)#4     | 1.961(6) | N(10)-Cu(4)#2       | 1.976(6) |
| N(2)-Cu(1)-O(9)  | 89.0(3)  | N(8)-Cu(3)-N(7)#4   | 97.1(2)  |
| N(2)-Cu(1)-O(5)  | 170.2(3) | O(12)-Cu(2)-N(3)#1  | 166.5(3) |
| O(9)-Cu(1)-O(5)  | 90.6(2)  | O(12)-Cu(2)-N(5)#1  | 93.1(3)  |
| N(2)-Cu(1)-N(4)  | 96.3(3)  | N(3)#1-Cu(2)-N(5)#1 | 96.7(3)  |
| O(9)-Cu(1)-N(4)  | 165.2(3) | O(12)-Cu(2)-O(1)#1  | 89.2(3)  |
| O(5)-Cu(1)-N(4)  | 81.8(2)  | N(3)#1-Cu(2)-O(1)#1 | 80.8(3)  |
| N(2)-Cu(1)-O(10) | 98.2(3)  | N(5)#1-Cu(2)-O(1)#1 | 177.5(3) |
| O(9)-Cu(1)-O(10) | 97.4(3)  | O(12)-Cu(2)-O(11)   | 92.7(3)  |
| O(5)-Cu(1)-O(10) | 91.6(3)  | N(3)#1-Cu(2)-O(11)  | 96.2(2)  |



|                     |          |                    |          |
|---------------------|----------|--------------------|----------|
| N(4)-Cu(1)-O(10)    | 95.6(3)  | N(5)#1-Cu(2)-O(11) | 91.8(3)  |
| O(1)#1-Cu(2)-O(11)  | 89.0(2)  | O(14)-Cu(3)-O(18)  | 87.5(2)  |
| N(11)-Cu(4)-N(10)#2 | 95.9(3)  | N(8)-Cu(3)-O(18)   | 175.1(3) |
| N(11)-Cu(4)-O(24)   | 92.4(3)  | N(7)#4-Cu(3)-O(18) | 81.9(2)  |
| N(10)#2-Cu(4)-O(24) | 161.9(3) | O(14)-Cu(3)-O(13)  | 96.8(3)  |
| N(11)-Cu(4)-O(19)   | 173.8(3) | N(8)-Cu(3)-O(13)   | 89.5(3)  |
| N(10)#2-Cu(4)-O(19) | 81.4(2)  | N(7)#4-Cu(3)-O(13) | 94.9(3)  |
| O(24)-Cu(4)-O(19)   | 88.8(2)  | O(18)-Cu(3)-O(13)  | 95.3(3)  |
| N(11)-Cu(4)-O(21)   | 94.3(3)  | O(24)-Cu(4)-O(21)  | 91.4(3)  |
| N(10)#2-Cu(4)-O(21) | 104.0(3) | O(19)-Cu(4)-O(21)  | 91.7(3)  |
| O(14)-Cu(3)-N(7)#4  | 164.8(3) | O(14)-Cu(3)-N(8)   | 92.5(3)  |

Symmetry transformations used to generate equivalent atoms: #1  $x-1, y, z$ ; #2  $-x-1, -y-1, -z$ ;

#3  $x+1, y, z$ ; #4  $-x, -y-1, -z+1$ .

**Table S9.** Selected bond lengths [Å] and angles [deg] for **4**

|                    |           |                    |           |
|--------------------|-----------|--------------------|-----------|
| N(1)-Cu(1)         | 2.005(9)  | N(9)-Cu(1)         | 1.955(9)  |
| N(2)-Cu(2)         | 1.962(9)  | O(4)-Cu(1)         | 1.972(8)  |
| N(4)-Cu(2)         | 1.999(10) | O(5)-Cu(1)         | 2.278(10) |
| N(5)-Cu(3)#1       | 1.973(10) | O(6)-Cu(1)         | 1.960(9)  |
| N(6)-Cu(3)         | 1.979(11) | O(7)-Cu(2)         | 2.312(10) |
| O(44)-Cu(3)        | 1.982(9)  | O(8)-Cu(2)         | 1.987(8)  |
| O(14)-Cu(3)        | 1.951(9)  | O(41)-Cu(2)        | 1.95(2)   |
| O(15)-Cu(3)        | 2.424(11) | Cu(3)-N(5)#1       | 1.973(10) |
| N(1)-Cu(1)-O(5)    | 96.5(4)   | O(41)-Cu(2)-O(8)   | 88.4(6)   |
| O(41)-Cu(2)-N(2)   | 93.3(6)   | N(2)-Cu(2)-O(8)    | 174.0(4)  |
| N(9)-Cu(1)-O(6)    | 95.5(4)   | O(4)-Cu(1)-N(1)    | 81.6(3)   |
| N(9)-Cu(1)-O(4)    | 166.9(4)  | N(9)-Cu(1)-O(5)    | 98.7(4)   |
| O(6)-Cu(1)-O(4)    | 84.6(4)   | O(6)-Cu(1)-O(5)    | 96.8(5)   |
| N(9)-Cu(1)-N(1)    | 95.2(4)   | O(4)-Cu(1)-O(5)    | 94.4(4)   |
| O(6)-Cu(1)-N(1)    | 161.5(4)  | O(14)-Cu(3)-O(44)  | 91.0(4)   |
| O(41)-Cu(2)-N(4)   | 162.8(7)  | N(5)#1-Cu(3)-O(44) | 82.1(4)   |
| N(2)-Cu(2)-N(4)    | 95.2(4)   | N(6)-Cu(3)-O(44)   | 177.0(4)  |
| O(8)-Cu(2)-N(4)    | 81.7(4)   | O(14)-Cu(3)-O(15)  | 91.5(5)   |
| O(41)-Cu(2)-O(7)   | 91.7(7)   | N(5)#1-Cu(3)-O(15) | 89.9(4)   |
| N(2)-Cu(2)-O(7)    | 94.9(4)   | N(6)-Cu(3)-O(15)   | 96.8(4)   |
| O(8)-Cu(2)-O(7)    | 90.8(4)   | O(44)-Cu(3)-O(15)  | 84.9(4)   |
| N(4)-Cu(2)-O(7)    | 102.5(5)  | O(14)-Cu(3)-N(6)   | 91.4(4)   |
| O(14)-Cu(3)-N(5)#1 | 172.8(4)  | N(5)#1-Cu(3)-N(6)  | 95.5(4)   |

Symmetry transformations used to generate equivalent atoms: #1  $-x+1, -y-1, -z$ .

**Table S10.** Selected bond lengths [Å] and angles [deg] for **5**

|                    |           |                   |           |
|--------------------|-----------|-------------------|-----------|
| Cu(1)-O(26)        | 2.299(19) | N(2)-Cu(1)#1      | 1.965(19) |
| Cu(1)-N(2)#1       | 1.965(18) | O(3)-Cu(1)        | 1.990(17) |
| O(25)-Cu(1)        | 1.971(18) | N(1)-Cu(1)        | 2.005(18) |
| N(2)#1-Cu(1)-O(25) | 93.0(7)   | N(2)#1-Cu(1)-O(3) | 173.8(8)  |
| O(25)-Cu(1)-O(26)  | 93.9(8)   | N(2)#1-Cu(1)-N(1) | 95.7(7)   |
| O(3)-Cu(1)-O(26)   | 93.6(8)   | O(25)-Cu(1)-N(1)  | 169.5(7)  |
| N(1)-Cu(1)-O(26)   | 91.6(7)   | O(3)-Cu(1)-N(1)   | 81.4(7)   |
| N(2)#1-Cu(1)-O(26) | 91.9(8)   | O(25)-Cu(1)-O(3)  | 89.4(7)   |

Symmetry transformations used to generate equivalent atoms: #1 -x+3/2, -y-1/2, -z.

**Table S11.** Selected bond lengths [Å] and angles [deg] for **6**

|                    |           |                     |           |
|--------------------|-----------|---------------------|-----------|
| N(2)-Cu(1)#1       | 1.94(3)   | Cu(1)-N(1)          | 2.01(3)   |
| Cu(1)-O(2W)        | 2.40(5)   | Cu(1)-O(100)        | 1.97(2)   |
| Cu(1)-O(1W)        | 1.95(3)   | Cu(1)-N(2)#1        | 1.94(3)   |
| O(100)-Cu(1)-N(1)  | 80.5(11)  | O(1W)-Cu(1)-O(100)  | 91.1(12)  |
| O(1W)-Cu(1)-N(1)   | 171.6(12) | N(2)#1-Cu(1)-N(1)   | 96.1(12)  |
| N(1)-Cu(1)-O(2W)   | 83.8(15)  | N(2)#1-Cu(1)-O(100) | 175.2(13) |
| O(100)-Cu(1)-O(2W) | 92.3(17)  | N(2)#1-Cu(1)-O(1W)  | 92.3(13)  |
| O(1W)-Cu(1)-O(2W)  | 95.7(17)  | N(2)#1-Cu(1)-O(2W)  | 90.7(18)  |

Symmetry transformations used to generate equivalent atoms: #1 -x+1, -y, -z+1.

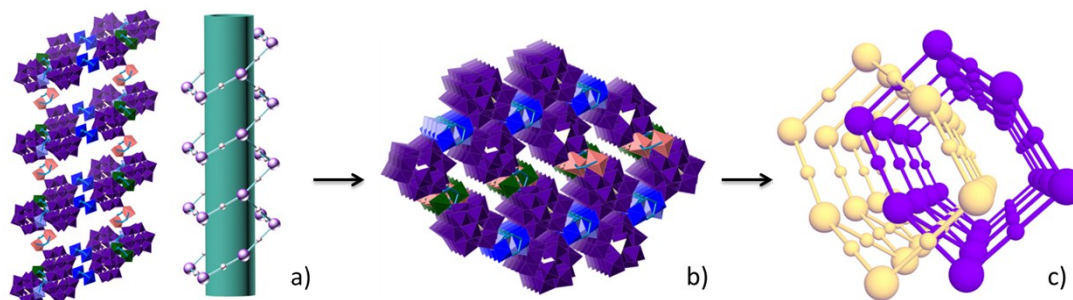

**Figure S6.** (a) The open channel in complex **1**. (b) Two-fold interpenetrated channels. (c) Topology view of two-fold interpenetrated channels.

### Analyses of IR Spectra and PXRD.

The IR spectra of complexes **1–6** are shown in Figure S2–7. The IR spectra exhibit the characteristic peaks at 1015, 971, 923 and 803  $\text{cm}^{-1}$  in **1**, 1015, 973920 and 795  $\text{cm}^{-1}$  in **5**, 1062, 960, 880, 807  $\text{cm}^{-1}$  in **6**, which are attributed to  $\nu(\text{Si-O})$ ,  $\nu(\text{W=Ot})$ ,  $\nu_{\text{as}}(\text{W-Ob-W})$  and  $\nu_{\text{as}}(\text{W-Oc-W})$  from  $\text{SiW}_{12}$  clusters. The IR spectra exhibit the characteristic peaks at 1061, 962, 882 and 808  $\text{cm}^{-1}$  in **2**, 1060, 960, 869 and 803  $\text{cm}^{-1}$  in **3**, which are attributed to  $\nu(\text{P-O})$ ,  $\nu(\text{Mo=Ot})$ ,  $\nu_{\text{as}}(\text{Mo-Ob-Mo})$  and  $\nu_{\text{as}}(\text{Mo-Oc-Mo})$  from  $\text{PMo}_{12}$  clusters. The IR spectra exhibit

the characteristic peaks at 1059, 956, 886 and 818  $\text{cm}^{-1}$  in **4**, which are attributed to  $\nu(\text{P-O})$ ,  $\nu(\text{W=Ot})$ ,  $\nu_{\text{as}}(\text{W-Ob-W})$  and  $\nu_{\text{as}}(\text{W-Oc-W})$  from  $\text{PW}_{12}$  clusters. Additionally, the bands in the region of 1675 to 1125  $\text{cm}^{-1}$  could be ascribed to the characteristic peaks of tda ligands in complexes **1-6**.

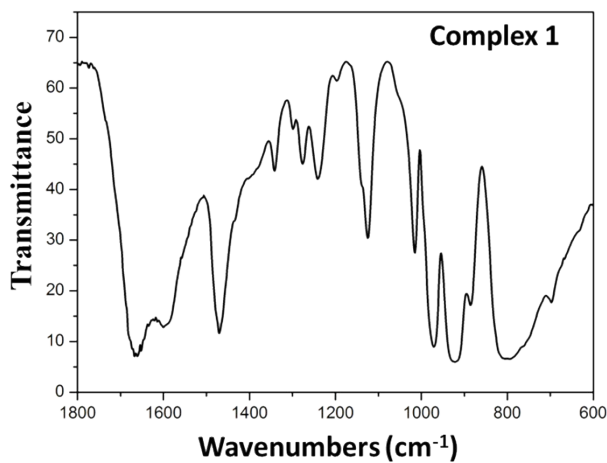

**Figure S7.** Reflect-IR of complex **1**

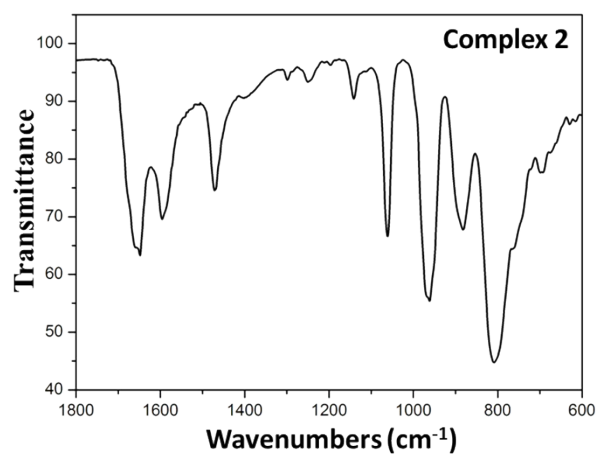

**Figure S8.** Reflect-IR of complex **2**

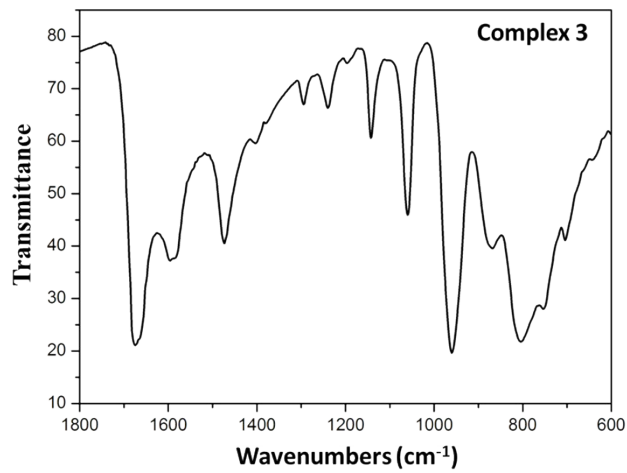

**Figure S9.** Reflect-IR of complex 3

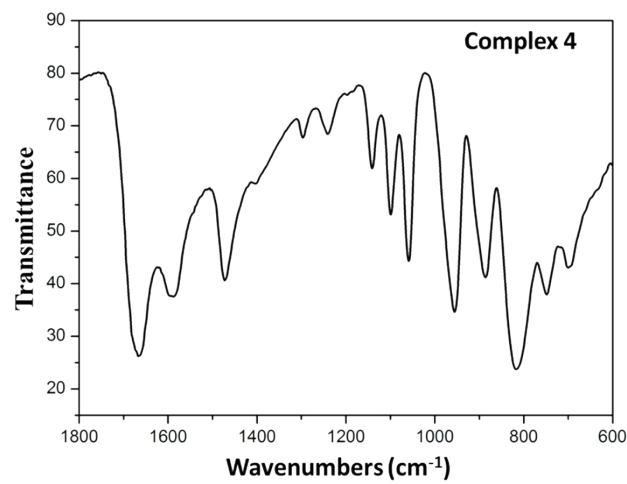

**Figure S10.** Reflect-IR of complex 4

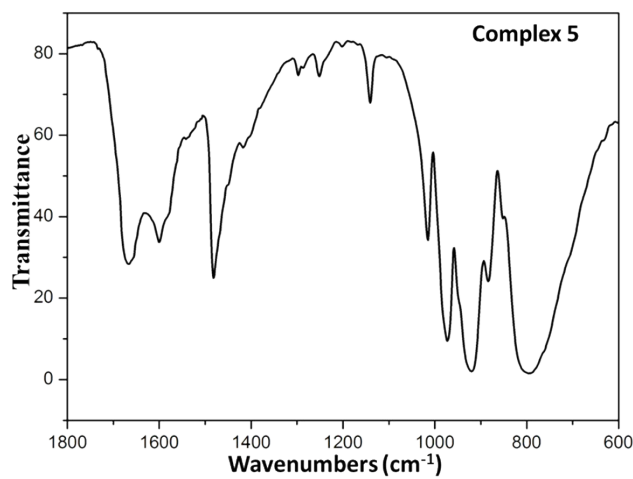

**Figure S11.** Reflect-IR of complex 5



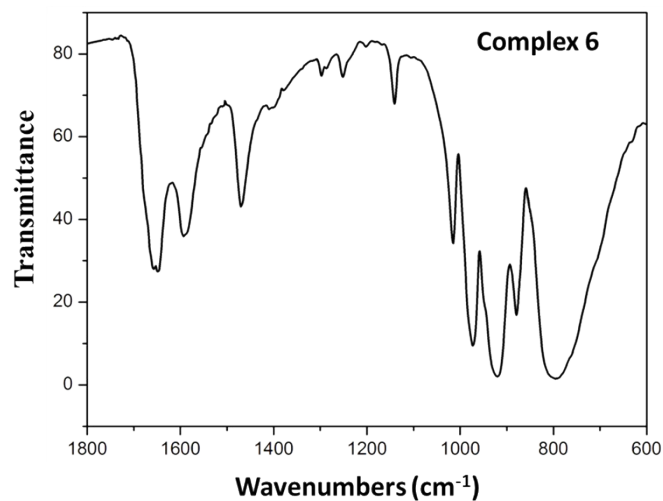

**Figure S12.** Reflect-IR of complex 6

### **Analyses of PXRD.**

As shown in Figure S8–13 the X-ray powder diffraction patterns measured for the as-synthesized samples of **1–6** are all in good agreement with the PXRD patterns simulated from the respective single-crystal X-ray data, proving the purity of the bulk phases.

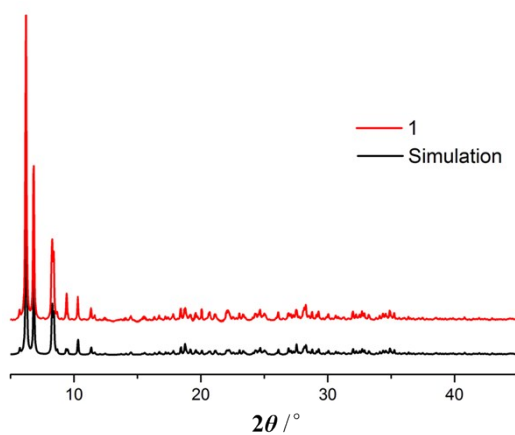

**Figure S13.** Powder X-ray diffraction patterns for **1**.

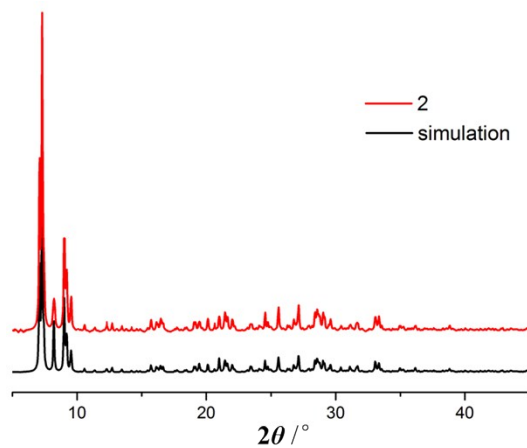

**Figure S14.** Powder X-ray diffraction patterns for **2**.

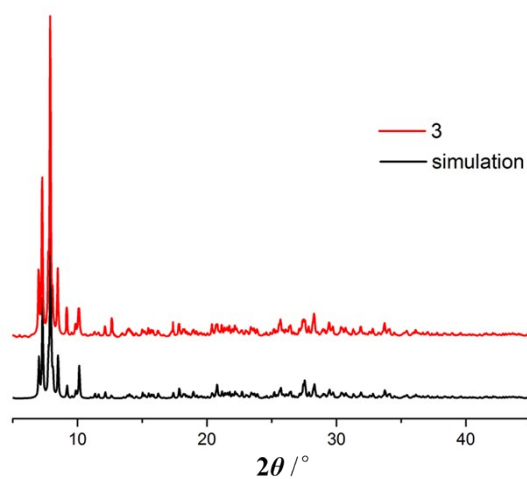

**Figure S15.** Powder X-ray diffraction patterns for **3**.

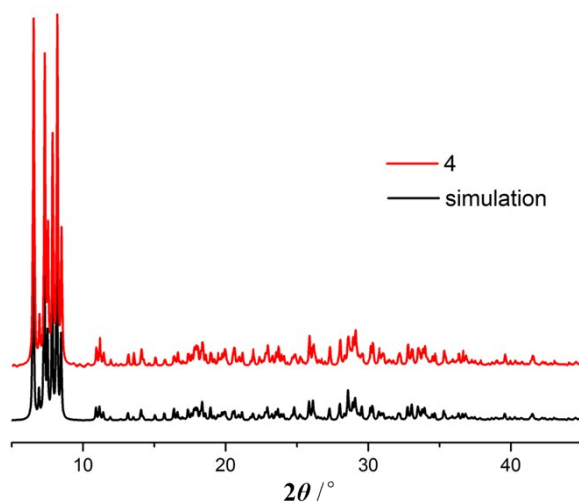

**Figure S16.** Powder X-ray diffraction patterns for **4**.

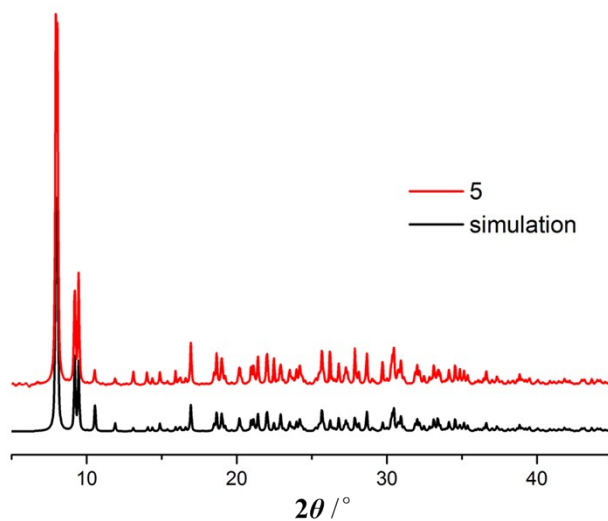

**Figure S17.** Powder X-ray diffraction patterns for **5**.

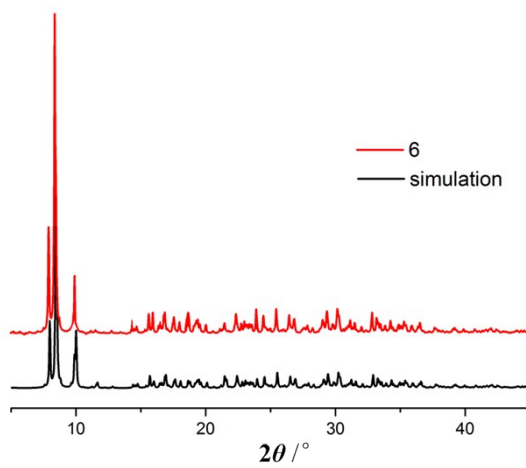

**Figure S18.** Powder X-ray diffraction patterns for **6**.

PXRD of complexes 1, 5 and 6 before and after the catalytic process.

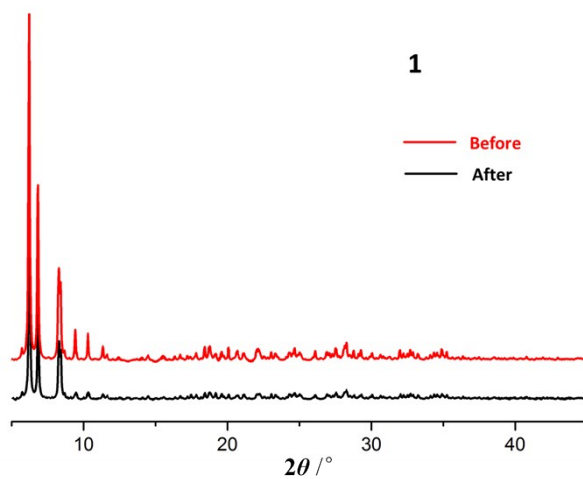

**Figure S19.** PXRD pattern of complex **1** before (red line) and after (black line) catalytic process.

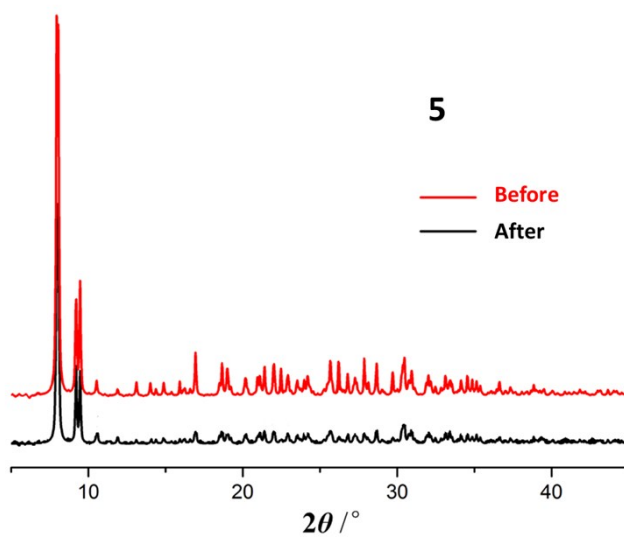

**Figure S20.** PXRD pattern of complex **5** before (red line) and after (black line) catalytic process.



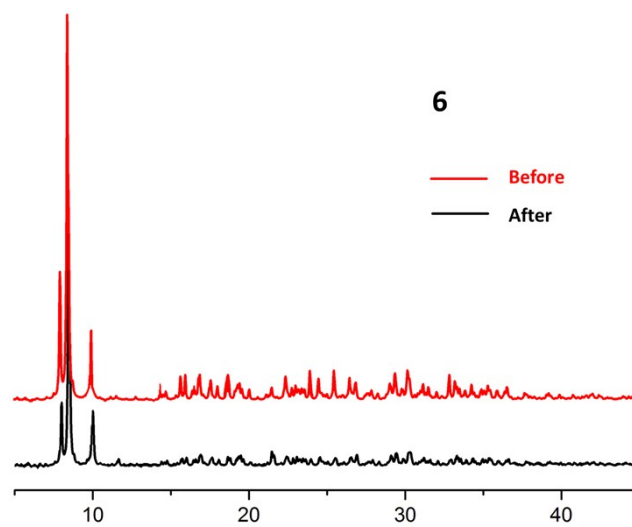

**Figure S21.** PXRD pattern of complex **6** before (red line) and after (black line) catalytic process.

### Thermal Stability of Complexes 1-6.

The thermogravimetric curve for **1** exhibits an initial weight loss of 8.0% before 150 °C, corresponding to the removal of seventeen free and coordinated water molecules (calcd. 7.5%) (Figure S14). After the loss of all the water molecules, the framework begins to decompose with a continuous weight loss up to 250 °C. The TGA curve of **2** shows a weight loss of 7.0% before 280 °C, ascribed to the release of ten water molecules (calcd. 6.7%) (Figure S15). After the loss of all the water molecules, the framework begins to decompose with a continuous weight loss up to 400 °C. In **3**, the result shows a weight loss of 10% during the first major step before 150 °C, corresponding to the removal of fourteen water molecules (calcd. 8.3%) (Figure S16), After the loss of all the water molecules, the framework is stable up to 300 °C and then begins to decompose upon further heating. For **4**, the first weight loss is approximately 12% before 250 °C, attributed to the release of twenty water molecules (calcd. 11.4%) and the framework begins to decompose with a continuous weight loss up to 300 °C (Figure S17). TGA of **5** shows a weight loss of 7.6% around 300 °C which can be assigned due to the loss of four seven molecules and two TMA<sup>+</sup> cations (calc. 6.8%) (Figure S18). After 300 °C the framework begins to decompose. TGA of **6** shows a weight loss of 6.9% around 300 °C which can be assigned due to the loss of four water molecules and two TMA<sup>+</sup> cations (calc. 7.2%) (Figure S19). After 300 °C the framework begins to decompose.

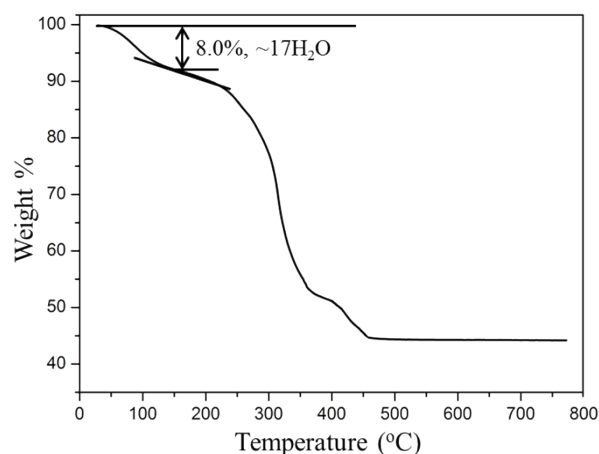

**Figure S22.** TGA spectra for **1** for the as-synthesized. <150 °C, Loss of surface/free water and coordinated water; >150 °C, framework degradation.

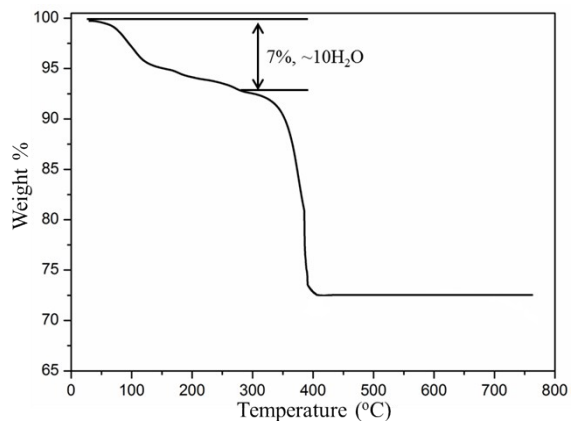

**Figure S23.** TGA spectra for **2** for the as-synthesized. <280 °C, Loss of surface/free water and coordinated water; >280 °C, framework degradation.

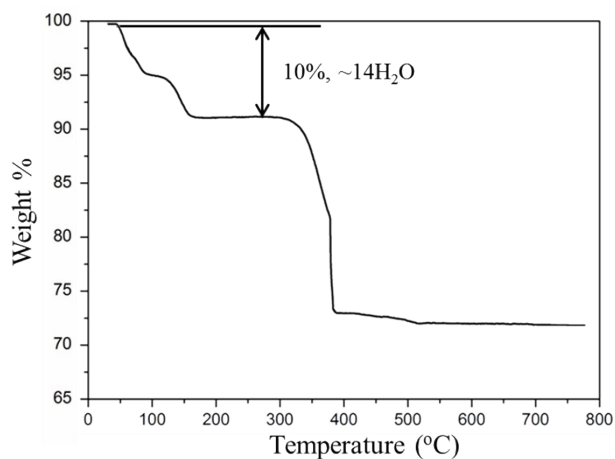

**Figure S24.** TGA spectra for **3** for the as-synthesized. <300 °C, Loss of surface/free water and coordinated water; >300 °C, framework degradation.

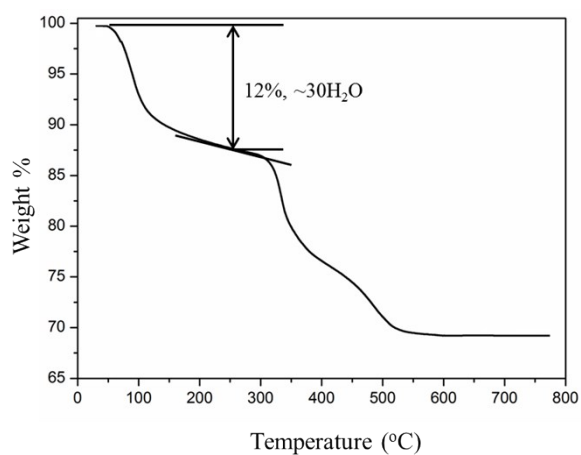

**Figure S25.** TGA spectra for **4** for the as-synthesized. <250 °C, Loss of surface/free water and coordinated water; >250 °C, framework degradation.

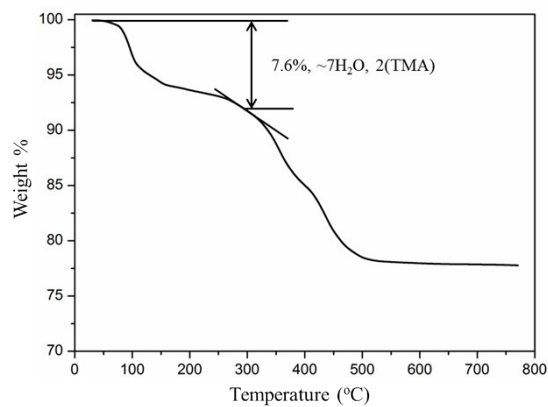

**Figure S26.** TGA spectra for **5** for the as-synthesized. <280 °C, Loss of surface/free water and coordinated water; >280 °C, framework degradation.

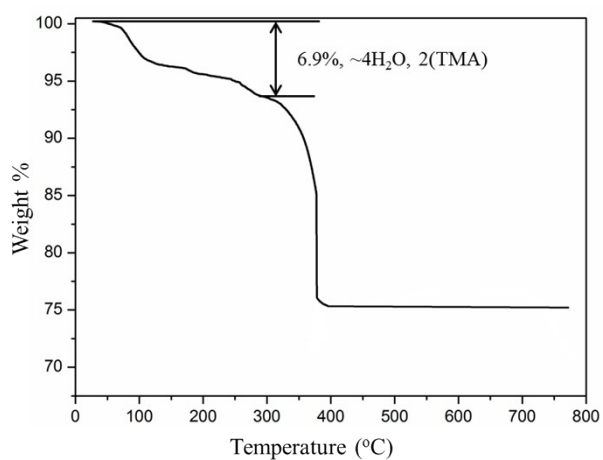

**Figure S27.** TGA spectra for **6** for the as-synthesized. <300 °C, Loss of surface/free water and coordinated water; >300 °C, framework degradation.
